# Supplementary material
Source: publisher figshare collection journal article supplement (https://tandf.figshare.com/ndownloader/files/22293885)
Supplement: Supplementary file [file 22293885]

## Supplementary data

Table 2. Implants used in primary MoM surgeries

| Cup brand  | Manufacturer   | MoM THAs | Resurfacings |
|------------|----------------|----------|--------------|
| ASR        | Depuy          | 237      | 68           |
| BHR        | Smith & Nephew | 35       | 30           |
| Conserve + | Wright Medical | 2        |              |
| Continuum  | Zimmer         | 2        |              |
| Durom      | Zimmer         | 11       | 8            |
| M2A        | Biomet         | 12       |              |
| Mitch      | Stryker        | 5        |              |
| Pinnacle   | Depuy          | 68       |              |
| R3         | Smith & Nephew | 31       |              |
| ReCap      | Biomet         | 12       | 2            |
| Universal  | Biomet         | 4        |              |
| Vision     | Biomet         | 1        |              |
| Total      |                | 420      | 108          |

THA = total hip arthroplasty; ASR = Articular Surface Replacement; BHR = Birmingham Hip Resurfacing.  
Full affiliations of manufacturers:  
Depuy Orthopaedics, Warsaw, IN, USA;  
Smith & Nephew, Memphis, TN, USA;  
Wright Medical, Memphis, TN, USA;  
Zimmer, Warsaw, IN, USA;  
Biomet, Warsaw, IN, USA;  
Stryker, Mahwah, NJ, USA.

Table 3. Implants used in revision surgeries

| Manu-<br>facturer                                  | Cup<br>brand        | n   | Bearing<br>surface | n   | Head size<br>median (range) |
|----------------------------------------------------|---------------------|-----|--------------------|-----|-----------------------------|
| Zimmer                                             | Continuum           | 190 | CoP                | 99  | 36 (36–44)                  |
|                                                    |                     |     | CoC                | 58  | 40 (36–40)                  |
|                                                    |                     |     | MoP                | 23  | 36 (32–40)                  |
| Depuy                                              | Pinnacle            | 108 | Constrained        | 10  | 36 (28–36)                  |
|                                                    |                     |     | CoC                | 59  | 36 (36–36)                  |
|                                                    |                     |     | CoP                | 34  | 36 (36–36)                  |
| Zimmer                                             | Trabecular<br>Metal | 105 | MoP                | 15  | 36 (36–36)                  |
|                                                    |                     |     | CoC                | 55  | 36 (28–36)                  |
|                                                    |                     |     | CoP                | 42  | 36 (28–36)                  |
| Depuy                                              | Deltamotion         | 70  | Monoblock CoC      | 8   | 36 (32–36)                  |
|                                                    |                     |     | CoC                | 70  | 48 (40–48)                  |
| Biomet                                             | Exceed              | 8   | CoC                | 6   | 36 (36–40)                  |
|                                                    |                     |     | CoP                | 2   | 36 (36–36)                  |
| Zimmer                                             | Regenerex           | 2   | Constrained        | 2   | 36                          |
| Stryker                                            | Trident             | 1   | CoC                | 1   | 36                          |
| Total                                              |                     | 484 |                    | 484 |                             |
| <b>Liner only revisions (old cup was retained)</b> |                     |     |                    |     |                             |
| Depuy                                              | Pinnacle            | 35  | CoP                | 25  | 36 (36–36)                  |
|                                                    |                     |     | MoP                | 6   | 36 (36–36)                  |
|                                                    |                     |     | CoC                | 4   | 36 (36–36)                  |
|                                                    |                     |     | CoP                | 5   | 36 (32–36)                  |
|                                                    | R3                  | 8   | MoP                | 2   | 36 (36–36)                  |
|                                                    |                     |     | CoC                | 1   | 36                          |
|                                                    |                     |     | CoC                | 1   | 36                          |
| Total                                              |                     | 43  |                    | 43  |                             |
| <b>Dual mobility revision</b>                      |                     |     |                    |     |                             |
| Stryker                                            | ADM                 | 1   | PoM                | 1   | 28                          |

CoC = ceramic-on-ceramic; CoP = ceramic-on-polyethylene; MoP = metal-on-polyethylene; PoM = polyethylene-on-metal (old Birmingham Hip Resurfacing cup retained); ADM = anatomic dual mobility. Full affiliations of manufacturers: See Table 2.

Table 6. Cox regression univariable and multivariable analysis of risk factors for re-revision after revision. Values are number, Hazard ratio (95% CI)

| Factor                                              |     | Univariable      |     | Multivariable    |
|-----------------------------------------------------|-----|------------------|-----|------------------|
| Primary implant type                                |     |                  |     |                  |
| Hip resurfacing                                     | 108 | 1.2 (0.6–2.6)    |     |                  |
| THA                                                 | 420 | Reference        |     |                  |
| Primary head size (mm) <sup>a</sup>                 | 528 | 1.03 (0.97–1.09) |     |                  |
| Sex                                                 |     |                  |     |                  |
| Male                                                | 226 | 1.3 (0.7–2.5)    |     |                  |
| Female                                              | 302 | Reference        |     |                  |
| Age at revision (years) <sup>a</sup>                | 528 | 0.99 (0.96–1.02) |     |                  |
| Bearing surface                                     |     |                  |     |                  |
| CoC                                                 | 199 | Reference        | 188 | Reference        |
| CoP                                                 | 207 | 1.6 (0.7–3.5)    | 193 | 1.3 (0.4–4)      |
| MoP                                                 | 101 | 1.5 (0.6–3.9)    | 93  | 1.7 (0.5–6)      |
| Constrained                                         | 20  | 1.9 (0.4–8)      | 19  | 2.1 (0.3–14)     |
| Imaging finding                                     |     |                  |     |                  |
| Pseudotumor                                         | 275 | 1.1 (0.6–2.2)    | 255 | 1.0 (0.5–2.1)    |
| No pseudotumor                                      | 253 | Reference        | 238 | Reference        |
| Grade of pseudotumor <sup>b</sup>                   |     |                  |     |                  |
| 0                                                   | 253 | Reference        | 238 | Reference        |
| 1                                                   | 104 | 1.2 (0.5–2.8)    | 94  | 1.0 (0.4–2.7)    |
| 2A                                                  | 56  | 1.1 (0.4–3.3)    | 52  | 1.2 (0.4–3.8)    |
| 2B                                                  | 93  | 1.0 (0.4–2.6)    | 87  | 0.8 (0.3–2.2)    |
| 3                                                   | 22  | 1.4 (0.3–6)      | 22  | 1.3 (0.3–6)      |
| Pseudotumor size (cm) <sup>a</sup>                  | 275 | 1.03 (0.92–1.14) | 255 | 1.00 (0.86–1.15) |
| Pre-revision cobalt (µg/L) <sup>a</sup>             | 528 | 1.00 (0.99–1.01) | 493 | 1.00 (0.99–1.01) |
| Years from primary surgery to revision <sup>a</sup> | 528 | 1.12 (0.98–1.29) |     |                  |
| Revision type                                       |     |                  |     |                  |
| Cup revision                                        | 374 | Reference        | 352 | Reference        |
| Liner revision                                      | 42  | 0.8 (0.2–3.3)    | 39  | 1.1 (0.2–6)      |
| Resurfacing revision                                | 108 | 1.2 (0.6–2.7)    | 102 | 1.1 (0.4–3.0)    |
| Cup and stem revision                               | 3   | Not analyzed     |     |                  |
| Dual mobility revision                              | 1   | Not analyzed     |     |                  |
| Revision head size (mm)                             |     |                  |     |                  |
| 28–32                                               | 26  | 2.3 (0.4–12)     | 21  | 2.2 (0.3–17)     |
| 36                                                  | 363 | 2.5 (1.0–7)      | 338 | 2.1 (0.6–7)      |
| 38–48                                               | 139 | Reference        | 134 | Reference        |
| Acetabular inclination (°) <sup>a</sup>             | 528 | 0.98 (0.93–1.03) |     |                  |
| Acetabular anteversion (°) <sup>a</sup>             | 528 | 1.0 (0.95–1.04)  |     |                  |
| ASA class                                           |     |                  |     |                  |
| 1                                                   | 82  | Reference        |     |                  |
| 2                                                   | 270 | 1.0 (0.4–2.5)    |     |                  |
| 3                                                   | 154 | 1.0 (0.4–2.8)    |     |                  |
| BMI <sup>a</sup>                                    | 519 | 1.01 (0.94–1.09) |     |                  |

<sup>a</sup> For continuous variables, hazard ratios are presented per increase of 1 unit.

<sup>b</sup> Grade of pseudotumor: See Table 4.

Analysis of bearing surfaces excluded one dual-mobility implant.

Class 4 of ASA grading was excluded due to including only 5 patients.

THA = total hip arthroplasty; CoC = ceramic-on-ceramic; CoP = ceramic-on-polyethylene; MoP = metal-on-polyethylene; BMI = body mass index.

Based on directed acyclic graphs (DAG, supplement) covariates included in the model for revision head size, bearing surface, and type of revision (liner/cup/resurfacing) were type of primary implant, sex, age, pseudotumor grade and size, pre-revision cobalt, primary head size, ASA class, inclination, anteversion, time from primary to revision, BMI, and the other two of bearing surface/revision head size/type of revision. In the model for pseudotumor (presence, grade, and size), type of primary implant (THA/resurfacing), primary head size, pre-revision cobalt, and time from primary to revision surgery were omitted from the model based on DAG. In analysis of pseudotumor size, those without pseudotumor were excluded (not marked as 0 cm). In analysis of pre-revision cobalt, pseudotumor was omitted based on DAG.

**Table 7. Cox regression univariable and multivariable analysis of risk factors for dislocations after the revision. Values are number, Hazard ratio (95% CI)**

| Factor                                              |     | Univariable      |     | Multivariable    |
|-----------------------------------------------------|-----|------------------|-----|------------------|
| Primary implant type                                |     |                  |     |                  |
| Hip resurfacing                                     | 107 | 0.5 (0.2–1.5)    |     |                  |
| THA                                                 | 401 | Reference        |     |                  |
| Primary head size (mm) <sup>a</sup>                 | 508 | 1.05 (0.99–1.12) |     |                  |
| Sex                                                 |     |                  |     |                  |
| Male                                                | 218 | 2.2 (1.1–4)      |     |                  |
| Female                                              | 290 | Reference        |     |                  |
| Age at revision (years) <sup>a</sup>                | 508 | 0.99 (0.95–1.02) |     |                  |
| Imaging finding                                     |     |                  |     |                  |
| Pseudotumor                                         | 261 | 1.0 (0.5–2.0)    | 242 | 1.0 (0.5–2.1)    |
| No pseudotumor                                      | 247 | Reference        | 236 | Reference        |
| Grade of pseudotumor <sup>b</sup>                   |     |                  |     |                  |
| 0                                                   | 247 | Reference        | 236 | Reference        |
| 1                                                   | 103 | 0.9 (0.4–2.3)    | 93  | 0.9 (0.3–2.5)    |
| 2A                                                  | 55  | 1.1 (0.4–3.3)    | 51  | 1.4 (0.4–4.4)    |
| 2B                                                  | 85  | 1.1 (0.4–2.8)    | 80  | 1.0 (0.4–2.8)    |
| 3                                                   | 18  | 0.8 (0.1–6)      | 18  | 0.8 (0.1–6.2)    |
| Pseudotumor size (cm) <sup>a</sup>                  | 261 | 1.02 (0.94–1.10) | 242 | 1.00 (0.83–1.21) |
| Pre-revision cobalt (µg/L) <sup>a</sup>             | 508 | 1.00 (0.99–1.01) | 478 | 1.00 (0.99–1.01) |
| Years from primary surgery to revision <sup>a</sup> | 508 | 1.13 (0.98–1.31) |     |                  |
| Revision head size (mm)                             |     |                  |     |                  |
| 28–32                                               | 18  | 9 (1.8–43)       | 15  | 10 (1.4–70)      |
| 36                                                  | 351 | 4 (1.3–14)       | 328 | 4 (1.2–16)       |
| 38–48                                               | 139 | Reference        | 135 | Reference        |
| Acetabular inclination (°) <sup>a</sup>             | 508 | 1.03 (0.98–1.08) |     |                  |
| Acetabular anteversion (°) <sup>a</sup>             | 508 | 1.01 (0.98–1.06) |     |                  |
| ASA class                                           |     |                  |     |                  |
| 1                                                   | 81  | Reference        |     |                  |
| 2                                                   | 257 | 1.3 (0.5–4)      |     |                  |
| 3                                                   | 149 | 1.6 (0.5–5)      |     |                  |
| BMI <sup>a</sup>                                    | 499 | 1.04 (0.97–1.12) |     |                  |

<sup>a</sup> For continuous variables, hazard ratios are presented per increase of 1 unit.

<sup>b</sup> Grade of pseudotumor: See Table 4.

Constrained implants were excluded from this analysis as per design they do not dislocate. Class 4 of ASA grading was excluded due to including only 5 patients. THA = total hip arthroplasty. BMI = body mass index.

Based on directed acyclic graphs (DAG, supplement) covariates included in the model for revision head size were type of primary implant, sex, age, pseudotumor grade and size, pre-revision cobalt, primary head size, ASA class, inclination, anteversion, time from primary to revision, and BMI. In the model for pseudotumor (presence, grade and size), type of primary implant (THA/resurfacing), primary head size, pre-revision cobalt, and time from primary to revision were omitted from the model based on DAG. In analysis of pseudotumor size, those without pseudotumor were excluded (not marked as 0 cm). In analysis of pre-revision cobalt, pseudotumor is omitted based on DAG.

### Directed acyclic graphs (DAG)

Reference: Reducing bias through directed acyclic graphs, Shrier and Platt 2008

“Interpretation: If X (exposure of interest) is dissociated from the outcome after the last step, then the statistical model chosen (i.e. one that includes only the chosen covariates) minimizes the bias of the estimate of X on the chosen outcome.”

**1st DAG (revision head size)**

- X (exposure of interest – revision head size)
- Outcome – re-revision

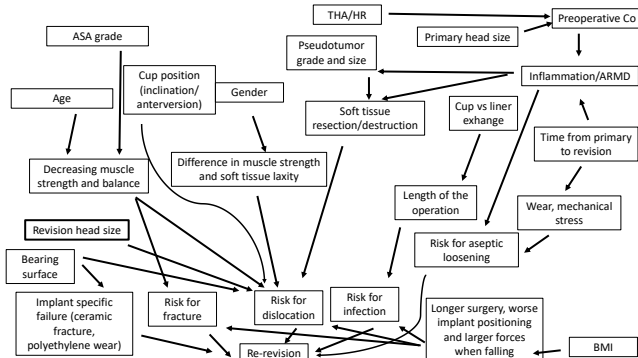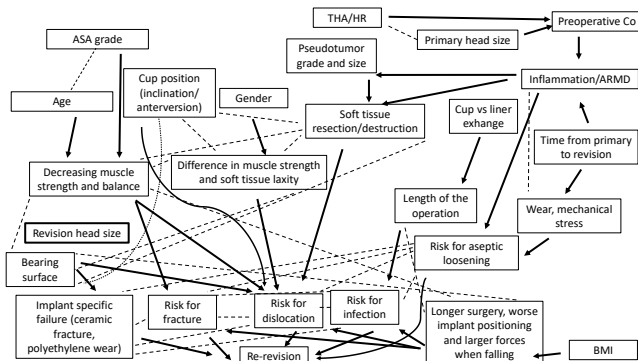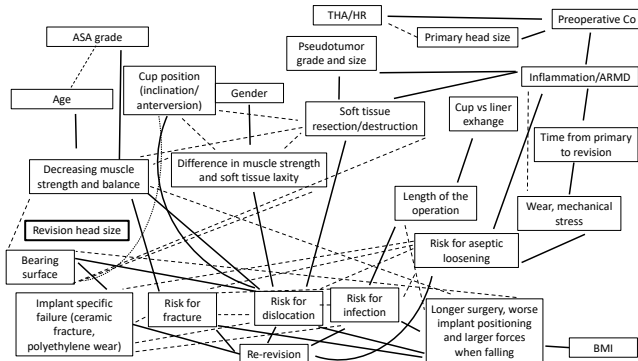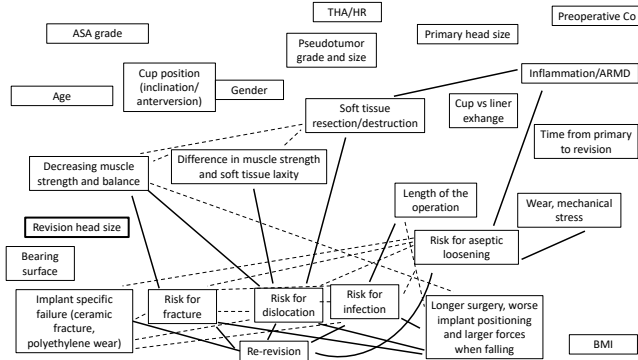

**1st DAG (revision head size)**

- X (revision head size) is dissociated from the outcome – all chosen covariates included

**2nd DAG (revision bearing surface)**

- X (exposure of interest) – bearing surface
- Outcome – re-revision

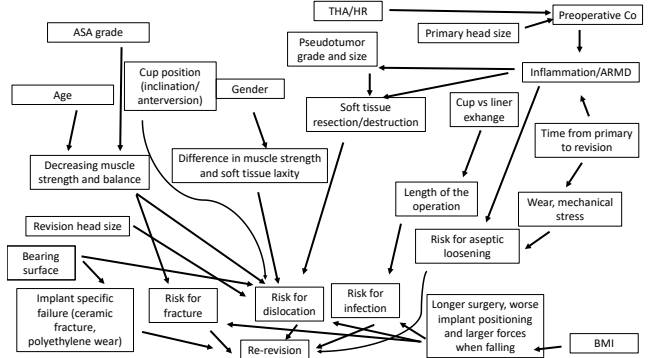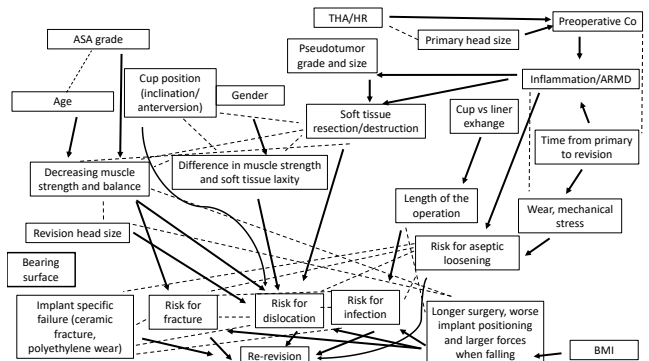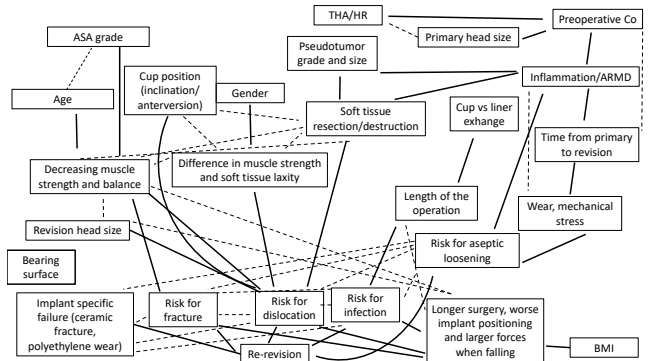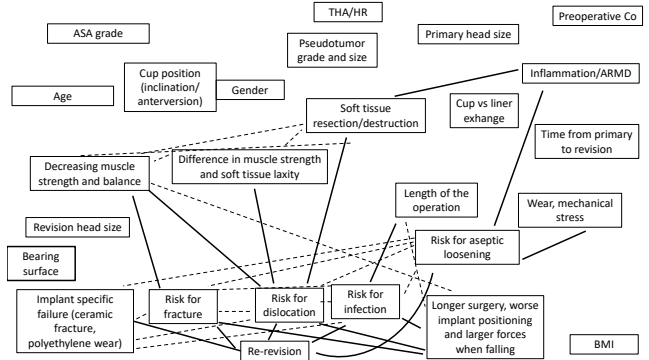

**2nd DAG (revision bearing surface)**

- X (bearing surface) is dissociated from the outcome – all chosen covariates included

**3rd DAG (pseudotumor)**

- X (exposure of interest) – pseudotumor
- Outcome – re-revision

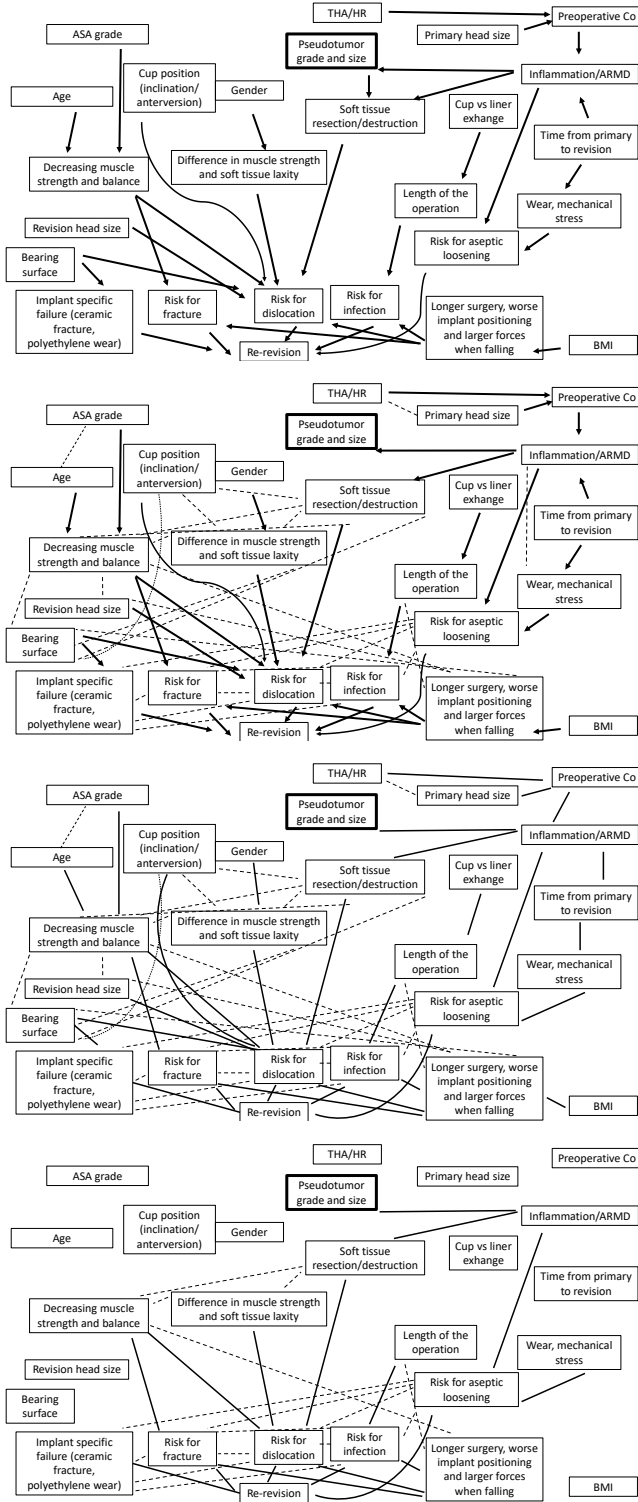

**3rd DAG (pseudotumor)**

• X (pseudotumor) is not dissociated from outcome. Variables affecting box "inflammation/ARMD" which connects X to outcome (THA/HR, primary head size, pre-revision Co, time from primary to revision) were excluded from the model

**4th DAG (type of revision)**

- X (exposure of interest) – type of revision (liner exchange, cup revision, resurfacing revision)
- Outcome – re-revision

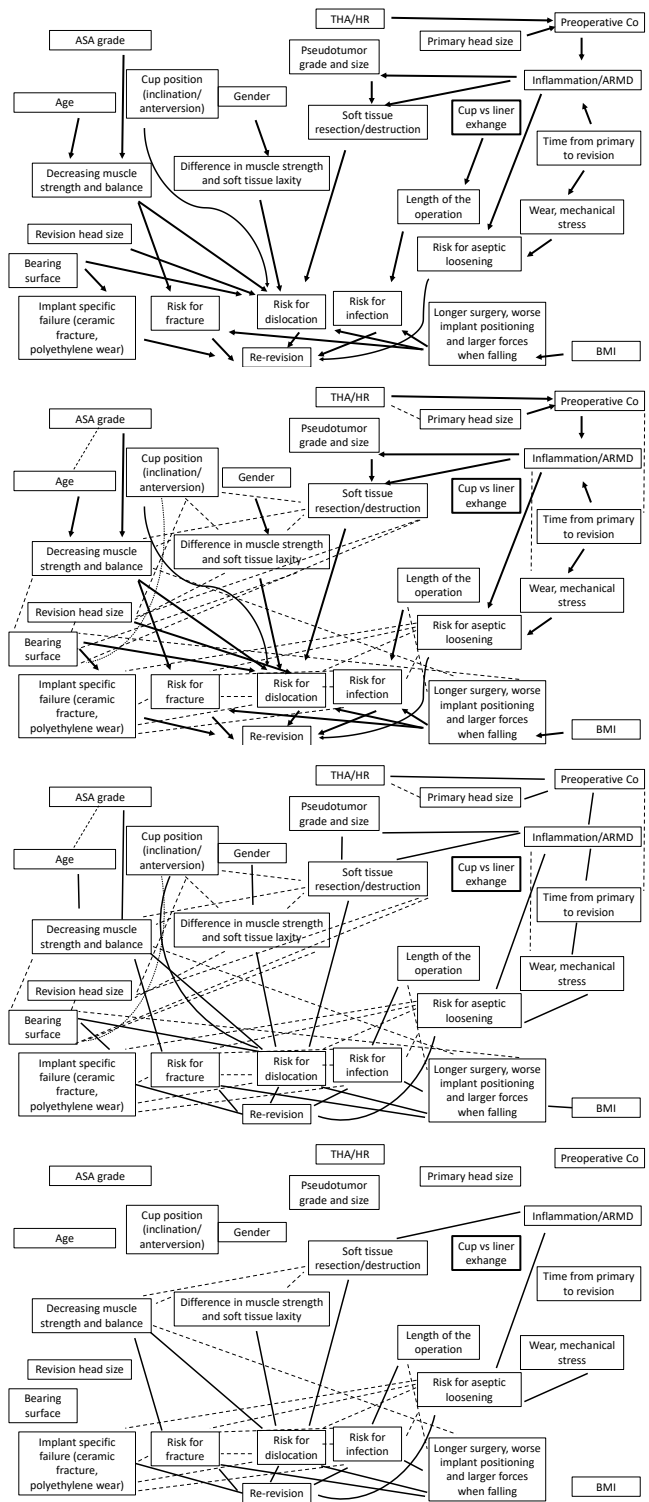

**4th DAG (type of revision)**

• X (type of revision) is dissociated from the outcome – all chosen covariates included

**5th DAG (pre-revision cobalt)**

- X (exposure of interest) – preoperative blood cobalt concentration
- Outcome – re-revision

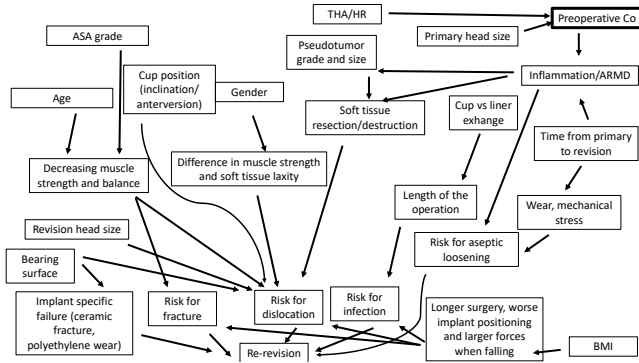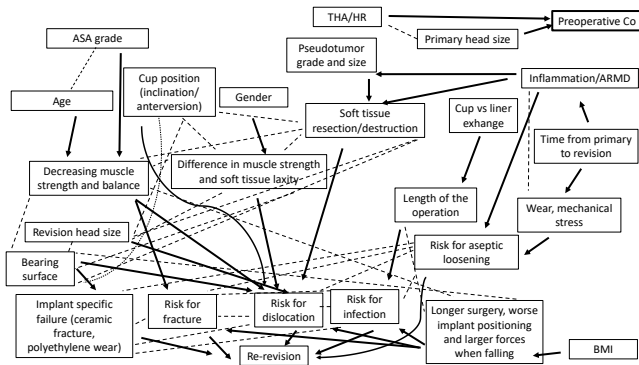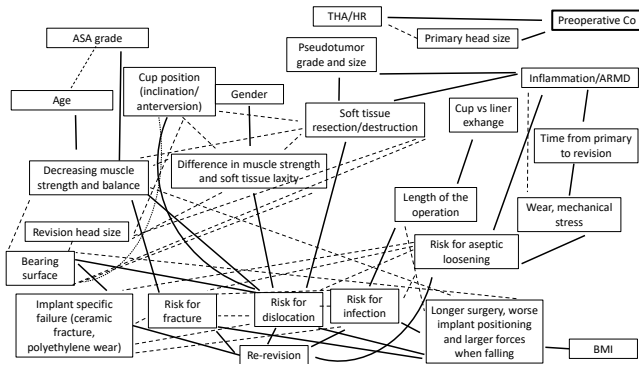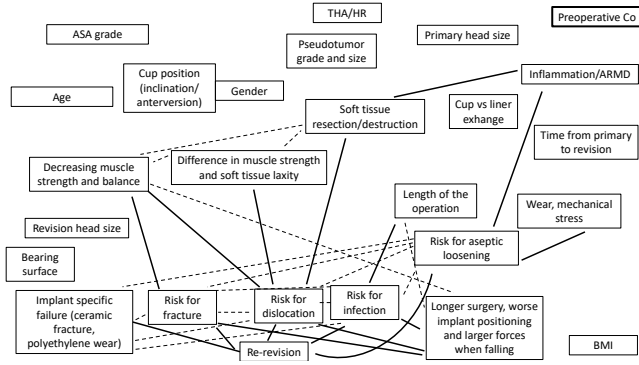

**5th DAG (pre-revision cobalt)**

- Pseudotumor is left out of the model because it is a descendant of preoperative Co
- X (preoperative Co) is dissociated from the outcome – all other covariates but pseudotumor included

**6th DAG (revision head size)**

- X (exposure of interest) – revision head size
- Outcome – dislocation

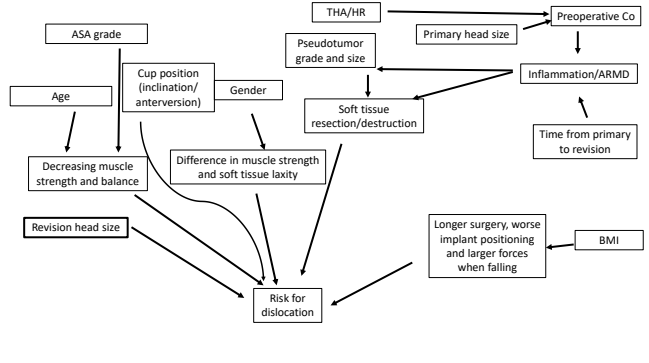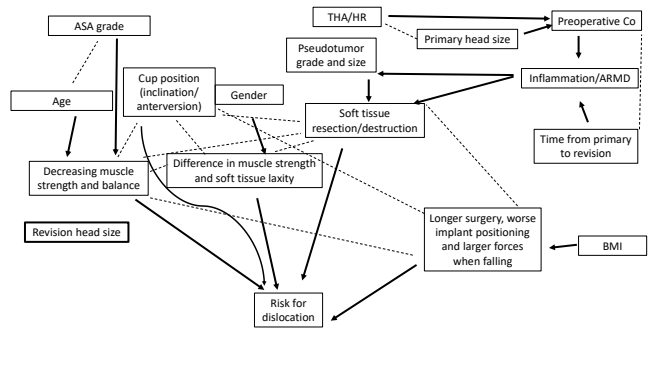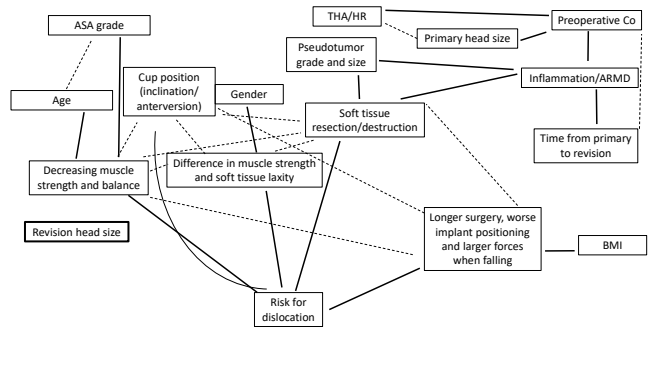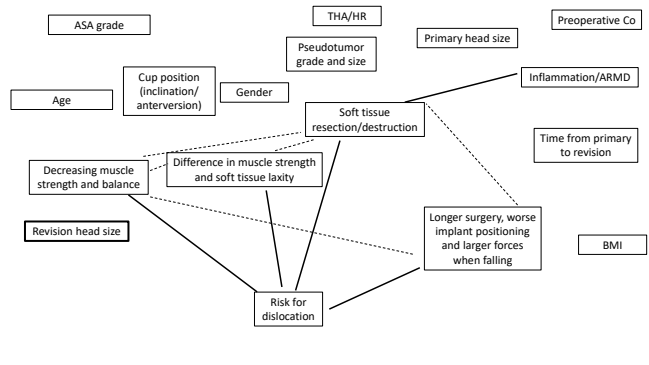

**6th DAG (revision head size)**

- X (revision head size) is dissociated from the outcome – all chosen covariates included



**7th DAG (pseudotumor)**

- X (exposure of interest) – pseudotumor
- Outcome – dislocation

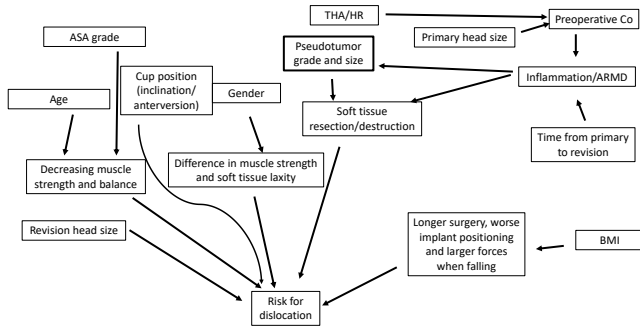

**8th DAG (pre-revision cobalt)**

- X (exposure of interest) – preoperative Co
- Outcome – dislocation

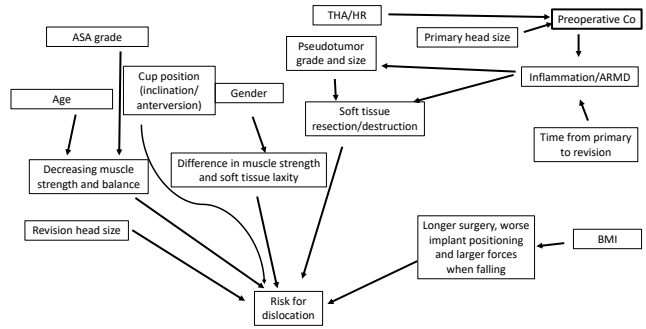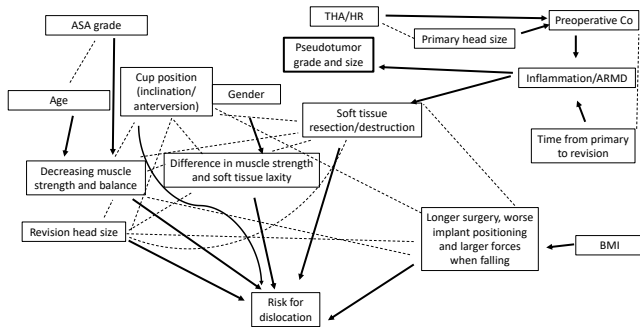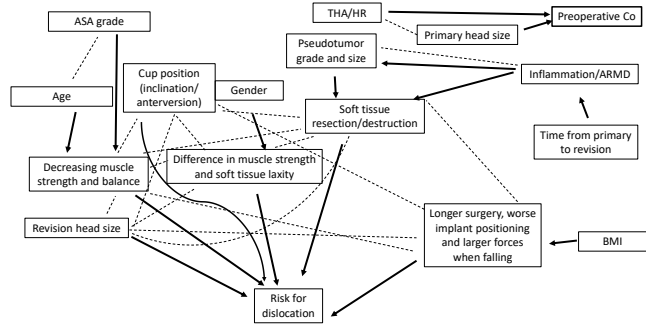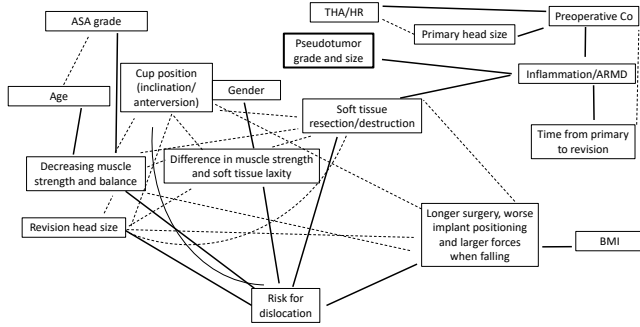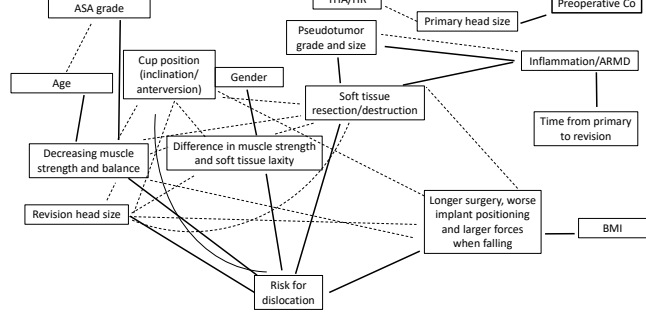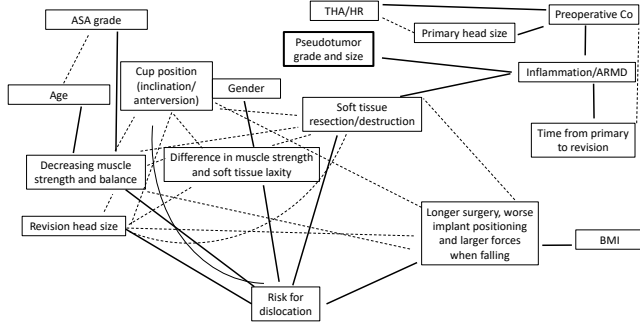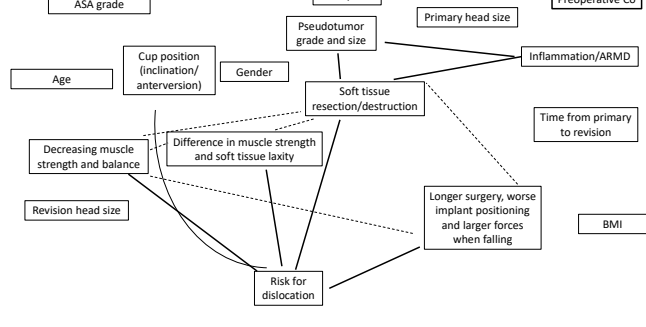

**7th DAG (pseudotumor)**

- X (pseudotumor) is not dissociated from outcome. Variables affecting box "inflammation /ARMD" which connects X to outcome (THA/HR, primary head size, pre-revision Co, time from primary to revision) were excluded from the model

**8th DAG (pre-revision cobalt)**

- Pseudotumor is left out of the model because it is a descendant of preoperative Co
- X (preoperative Co) is dissociated from the outcome – all other covariates but pseudotumor included
